# Supplementary material for: Discovery of Multi-Target-Directed Ligands by Targeting Host-specific SARS-CoV-2&rsquo;s Structurally Conserved Main Protease
Source: Preprints.org preprint supplement (doi:10.20944/preprints202004.0068.v2), 2020-04-09
Supplement: Supplementary file 1 [file Supplementary Data 1.xls]

## Sheet: Supplementary Data 3
Strucutres for the DALI analysis
6Y2F	5R7Y_A	100	306	0	0	1	306	1	306	0	640	100
6Y2F	3M3V_A	96.078	306	12	0	1	306	3	308	0	623	98.69
6Y2F	2A5K_A	96.078	306	12	0	1	306	2	307	0	623	98.69
6Y2F	3E91_A	96.078	306	12	0	1	306	1	306	0	623	98.69
6Y2F	1UJ1_A	96.078	306	12	0	1	306	1	306	0	623	98.69
6Y2F	1WOF_A	96.078	306	12	0	1	306	6	311	0	623	98.69
6Y2F	3F9E_A	95.752	306	13	0	1	306	3	308	0	622	98.69
6Y2F	2PWX_A	95.752	306	13	0	1	306	3	308	0	622	98.37
6Y2F	5B6O_A	95.752	306	13	0	1	306	1	306	0	621	98.37
6Y2F	4HI3_A	95.752	306	13	0	1	306	2	307	0	621	98.37
6Y2F	2QC2_A	95.752	306	13	0	1	306	3	308	0	621	98.37
6Y2F	3M3T_A	95.752	306	13	0	1	306	3	308	0	621	98.37
6Y2F	3M3S_A	95.752	306	13	0	1	306	1	306	0	620	98.37
6Y2F	3EA9_A	95.752	306	13	0	1	306	1	306	0	620	98.37
6Y2F	1Z1J_A	95.752	306	13	0	1	306	1	306	0	620	98.37
6Y2F	3F9F_A	95.752	306	13	0	1	306	3	308	0	620	98.37
6Y2F	2QCY_A	95.752	306	13	0	1	306	1	306	0	620	98.37
6Y2F	2Q6G_A	95.752	306	13	0	1	306	1	306	0	620	98.37
6Y2F	3ATW_A	95.752	306	13	0	1	306	1	306	0	620	98.37
6Y2F	1Q2W_A	96.053	304	12	0	1	304	3	306	0	619	98.68
6Y2F	2ALV_A	96.04	303	12	0	1	303	1	303	0	617	98.68
6Y2F	2VJ1_A	96.04	303	12	0	2	304	1	303	0	617	98.68
6Y2F	4MDS_A	95.71	303	13	0	1	303	1	303	0	615	98.35
6Y2F	2OP9_A	96.013	301	12	0	1	301	2	302	0	613	98.67
6Y2F	3SNA_A	96.013	301	12	0	1	301	1	301	0	613	98.67
6Y2F	2QIQ_A	95.681	301	13	0	1	301	1	301	0	612	98.67
6Y2F	3FZD_A	95.681	301	13	0	1	301	1	301	0	611	98.34
6Y2F	3F9G_A	95.681	301	13	0	1	301	3	303	0	611	98.34
6Y2F	3D62_A	95.987	299	12	0	3	301	1	299	0	610	98.66
6Y2F	4RSP_A	50.645	310	145	4	1	306	1	306	5.33e-113	323	66.77
6Y2F	4YLU_A	50.645	310	145	4	1	306	1	306	1.62e-112	322	66.77
6Y2F	5WKJ_A	50.645	310	145	4	1	306	8	313	1.8e-112	322	66.77
6Y2F	4WMD_A	50.323	310	146	4	1	306	1	306	2.38e-111	319	66.45
6Y2F	2YNA_A	49.677	310	148	4	1	306	1	306	9.37e-108	310	66.13
6Y2F	6JIJ_A	50	306	148	3	1	306	1	301	8.7e-105	302	64.38
6Y2F	3D23_A	49.175	303	151	2	1	303	3	302	1.44e-104	301	63.37
6Y2F	5GWZ_A	44.951	307	163	4	1	306	6	307	4.66e-91	267	64.5
6Y2F	5HYO_A	44.771	306	163	4	1	305	1	301	2.1e-90	265	64.38
6Y2F	4XFQ_A	44.737	304	162	4	1	303	1	299	4.78e-90	265	64.8
6Y2F	4ZUH_A	44.408	304	163	4	1	303	1	299	6.43e-89	262	64.47
6Y2F	5ZQG_A	44.408	304	163	4	1	303	2	300	8.6e-89	261	64.47
6Y2F	5EU8_A	44.118	306	167	3	1	306	6	307	4.12e-87	257	59.8
6Y2F	2AMP_A	44.444	306	166	3	1	306	3	304	4.13e-87	257	60.46
6Y2F	1LVO_A	44.444	306	166	3	1	306	1	302	5.2e-87	257	60.46
6Y2F	4F49_A	44.444	306	166	3	1	306	8	309	5.27e-87	257	60.46
6Y2F	4ZRO_A	44.224	303	165	3	1	303	1	299	2.05e-86	255	60.07
6Y2F	3TLO_A	44.3	307	166	4	1	306	1	303	1.76e-85	253	62.54
6Y2F	5GWY_A	44.3	307	166	4	1	306	6	308	2.97e-85	253	62.54
6Y2F	6FV1_A	44.408	304	164	4	1	303	1	300	1.41e-84	251	62.83
6Y2F	5NH0_B	44.408	304	164	4	1	303	1	300	1.53e-84	250	62.83
6Y2F	5NH0_A	44.554	303	163	4	1	302	1	299	2.01e-84	250	62.71
6Y2F	2K7X_A	96.667	120	4	0	187	306	1	120	2.88e-84	243	99.17
6Y2F	5NH0_C	44.224	303	164	4	1	302	1	299	6.29e-84	249	62.71
6Y2F	3EBN_A	96.61	118	4	0	189	306	1	118	1.84e-82	238	99.15
6Y2F	2ZU2_A	41.042	307	175	4	1	306	1	302	1.75e-81	243	61.24
6Y2F	1P9S_A	39.803	304	177	4	1	303	1	299	7.38e-76	228	59.54
6Y2F	2Q6D_A	40.823	316	168	7	1	306	3	309	1.6e-75	228	55.38
6Y2F	3EWQ_A	29.73	37	24	1	233	269	52	86	3.4	21.9	54.05
6Y2F	3EJG_A	29.73	37	24	1	233	269	79	113	4.7	21.6	54.05
6Y2F	5I08_A	30.435	46	27	2	110	154	652	693	9.8	21.2	47.83
