# Supplementary material for: Discovery of Multi-Target-Directed Ligands by Targeting Host-specific SARS-CoV-2&rsquo;s Structurally Conserved Main Protease
Source: Preprints.org preprint supplement (doi:10.20944/preprints202004.0068.v2), 2020-04-09
Supplement: Supplementary file 2 [file Supplementary Data 2.docx]

**Supplementary Data 2: Composition of custom-made library**

| **Type of molecules** | **Number** |
| --- | --- |
| 1. Terpenes | 313 |
| 1. Terpenoids | 3254 |
| 1. Anti-tussive | 82 |
| 1. Synthetic antivirals | 75 |
| 1. Anti Influenza | 17 |
| 1. Flavanoids | 1288 |
| 1. Alkaloids | 1080 |
| 1. Predicted anti-COVID-19 molecules (from literature | 130 |
| **Total** | **7139** |
