# Supplementary material for: Discovery of Multi-Target-Directed Ligands by Targeting Host-specific SARS-CoV-2&rsquo;s Structurally Conserved Main Protease
Source: Preprints.org preprint supplement (doi:10.20944/preprints202004.0068.v2), 2020-04-09
Supplement: Supplementary file 3 [file Supplementary Data 3.xlsx]

## Sheet: Sheet1
Binding Scores of all the molecules. Each sheet
Alkaloids					Terpenoids					Flavonoids
Molecule Name	Mpro	RdRp	Hace		Molecule Name	Mpro	RdRp	Hace		Molecule Name	Mpro	RdRp	Hace
(-)-asperlicin C	-9.7	-8.7	-9.5		Lactucopicrin 15-oxalate	-8.2	-8.7	-8.3		Cinnamtannin A1	-11	-10	-8.2
cassameridin	-9.3	-8.1	-8.1		Lactucopicrin	-7.8	-8.3	-8.3		epicatechin-(4beta->8)-epicatechin-(4beta->6)-catechin	-10.6	-11.9	-8.2
oriciacridone F	-9.1	-9.2	-6.7		(5S,9S,10S,13E)-labda-7,13-dien-15-yl diphosphate	-7.8	-7.4	-9		Anemone purple anthocyanin 1	-10.4	-12.6	-7.4
(+)-asperlicin E	-8.8	-8.9	-7.7		11,13-dihydrolactucin 15-oxalate	-7.6	-7.9	-7.1		Anemone blue anthocyanin 3	-10.1	-11.3	-7.7
(+)-Atherospermoline	-8.3	-9	-6.5		vitetrifolin D	-7.6	-7.2	-7.3		6''-hydroxybenzoylhyperin	-10.1	-8.9	-8.3
oxofangchirine	-8	-8.2	-6.2		metachromin S	-6.9	-7.3	-7.4		Cinnamtannin D2	-10	-11.9	-7.7
Dimethamine	-7.7	-7.4	-8.5		metachromin T	-6.8	-7.2	-7.7		Anemone blue anthocyanin 1	-10	-10.9	-6.8
terrequinone A	-7.7	-7.5	-6.5		integric acid	-6.8	-6.8	-6.8		(?)-epicatechin-(4??8)-(?)-epigallocatechin	-10	-10.3	-7.2
Dauricine	-7.6	-8.3	-6.9		viteagnusin I	-6.6	-6.9	-6.8		(+)-catechin-(4??8)-(?)-epigallocatechin	-10	-10.3	-7.2
					15-[(4-hydroxyphenyl)amino]retinal	-6.5	-6.5	-7.4		Gambiriin B2	-10	-9.9	-8.6
					cannabigerolic acid	-6.2	-6.1	-7.3		(?)-epigallocatechin-(4??8)-(?)-epicatechin	-10	-9.9	-7.6
Anti-virals					camelliol C	-6.2	-6.6	-6.6		Cinnamtannin A3	-9.9	-12.7	-6.5
Molecule Name	Mpro	RdRp	Hace		cannabinerolic acid	-6	-6.1	-7.1		Eriodictioside	-9.9	-10.1	-7.4
Invirase	-9	-8.6	-6.7							quercetin 3-glucosyl-(1->4)-rhamnoside	-9.9	-9.4	-6.5
Isentress	-8.7	-8.1	-6.6		Terpenoids					(+)-gallocatechin-(4??8)-(+)-catechin	-9.8	-10.4	-7.6
Rescriptor	-8.4	-7.9	-8.1		Molecule Name	Mpro	RdRp	Hace		5,6,7,4'-tetrahydroxyflavonol-3-O-rutinoside	-9.7	-10.1	-7.3
Prevymis	-8.3	-7.6	-8		Myricitrin	-8.9	-7.9	-7.1		Kaempferol 3-O-[6-(4-coumaroyl)-beta-D-glucosyl-(1->2)-beta-D-glucosyl-(1->2)-beta-D-glucoside]	-9.6	-12	-7.1
Prezista	-8.2	-6.7	-7.3		Chrysanthemin	-8.8	-7.7	-7.8		taiwanhomoflavone A	-9.6	-10.6	-7.8
Remdesivir	-8.2	-7.2	-7.8		Malvin	-8.5	-8.1	-6.5		(+)-gallocatechin-(4??8)-(+)-catechin	-9.6	-10.1	-7.6
Selzentry	-8.1	-7.3	-5.3		Delta viniferin	-8.4	-8.3	-7.4		Gambiriin A3	-9.6	-9.8	-8.5
Aptivus	-7.9	-6.4	-6.7		Myrtillin	-8.1	-8	-6.3		kaempferol-3-O-alpha-L-rhamnopyranosyl-(1->4)-beta-D-glucopyranoside	-9.6	-9.5	-6.5
Kaletra	-7.8	-7.3	-6.8		Apigenin	-7.8	-7.3	-7.1		cyanidin 3-O-[?-D-xylosyl-(1?2)-?-D-galactoside]	-9.6	-9.2	-8.2
Daclatasvir	-7.8	-7.6	-8.9		Kaempferol	-7.8	-7.9	-7.2
					Oenin	-7.8	-7.3	-6.9		Anti-influenza
Predicted anti-COVID-19 molecules					Rosmarinic acid	-7.8	-6.6	-7.4		Molecule Name	Mpro	RdRp	Hace
Molecule Name	Mpro	RdRp	Hace		Oleanolic acid	-7.7	-7.6	-7		Nympholide A	-7.8	-8.6	-5.7
Biorobin	-9.3	-9.1	-7.4		Columbin	-7.6	-7.9	-7.1		cedeodarin	-7	-8	-7.4
pedunculagin	-9	-9.5	-6.3		Tinosporaside	-7.5	-7.6	-6.8		Deodarin	-7.2	-7.9	-7.2
Procyanidin	-8.9	-8.4	-5.9		Ursolic acid	-7.5	-7.7	-7		Cedrin	-6.9	-7.9	-6.9
Gnidicin	-8.8	-8.3	-6		Peonidin	-7.4	-7.8	-7.1		Matairesinol	-7.2	-7.7	-8
Afzelin	-8.8	-8	-7.1		Coumestan	-7.4	-7.1	-6.8		Ampelopsin	-7	-7.7	-7.4
Quercetin 3-alpha-L-arabinofuranoside	-8.8	-8	-7.6		Myricetin	-7.4	-8.4	-7.4		Taxifolin	-7	-7.7	-7.2
Geraniin	-8.8	-9.9	-6.9		Galangin	-7.3	-6.6	-7.4		Emidin	-7.1	-7.1	-7.2
Avicularin	-8.7	-7.6	-7.2		Hederagenin	-7.3	-7.8	-8		Berberine	-7.3	-6.9	-7.5
Hirsutrin	-8.7	-7.7	-7.5		petunidin	-7.2	-7	-7.5		Nortrachelogenin	-7.1	-6.1	-7.4
Strictinin	-8.7	-10	-8.8		Berberin	-7	-7	-7.5
Tellimagradin	-8.7	-9.3	-6.2
Chrysin-7-O-β-glucuronide	-8.6	-8.7	-8.5
Hyperin	-8.6	-7.8	-8.1
Isoquercitrin	-8.6	-7.7	-7.9
pelargonidin glycosides	-8.6	-8.9	-6.1
Hesperidin	-8.5	-8.7	-9.8
Isoquercitrin (CHEMBL1098724)	-8.5	-7.7	-7.2
Houttuynoside A	-8.4	-7.4	-7.5
Granatin A	-8.4	-9.7	-6.3
Baicalin	-8.3	-8.3	-8.2
Luteolin-7-glucoside	-8.3	-8.3	-8.2
Neohesperidin	-8.2	-8.3	-7.8
Hyperin (Quercetin-3-O-galactoside)	-8.2	-8	-8.2
Isoquercitrin (Quercetin 3-.beta.-D-glucoside)	-8.2	-7.7	-7.8
Carminic acid	-8	-8.3	-7.1
Phyllaemblicin B	-8	-9.3	-7
punicalin	-7.8	-9.9	-6.3
Ursolic acid	-7.7	-7.9	-8.4
Prodelphinidin B3	-7.6	-8.2	-7.3
